# Supplementary material for: Rational design of water-harvesting hydrogels
Source: Royal Society of Chemistry journal article supplement (doi:10.1039/d3me00132f), 2023-10-20
Supplement: d3me00132f1.pdf [file d3me00132f1.pdf]

## Rational design of water-harvesting hydrogels

Moki K. Thanusing<sup>1</sup>, Peidong Shen<sup>1</sup>, Brett L. Pollard<sup>1</sup>, Luke A. Connal<sup>1\*</sup>

<sup>1</sup>Research school of chemistry, The Australian National University

\* luke.connal@anu.edu.au

## Supporting Information

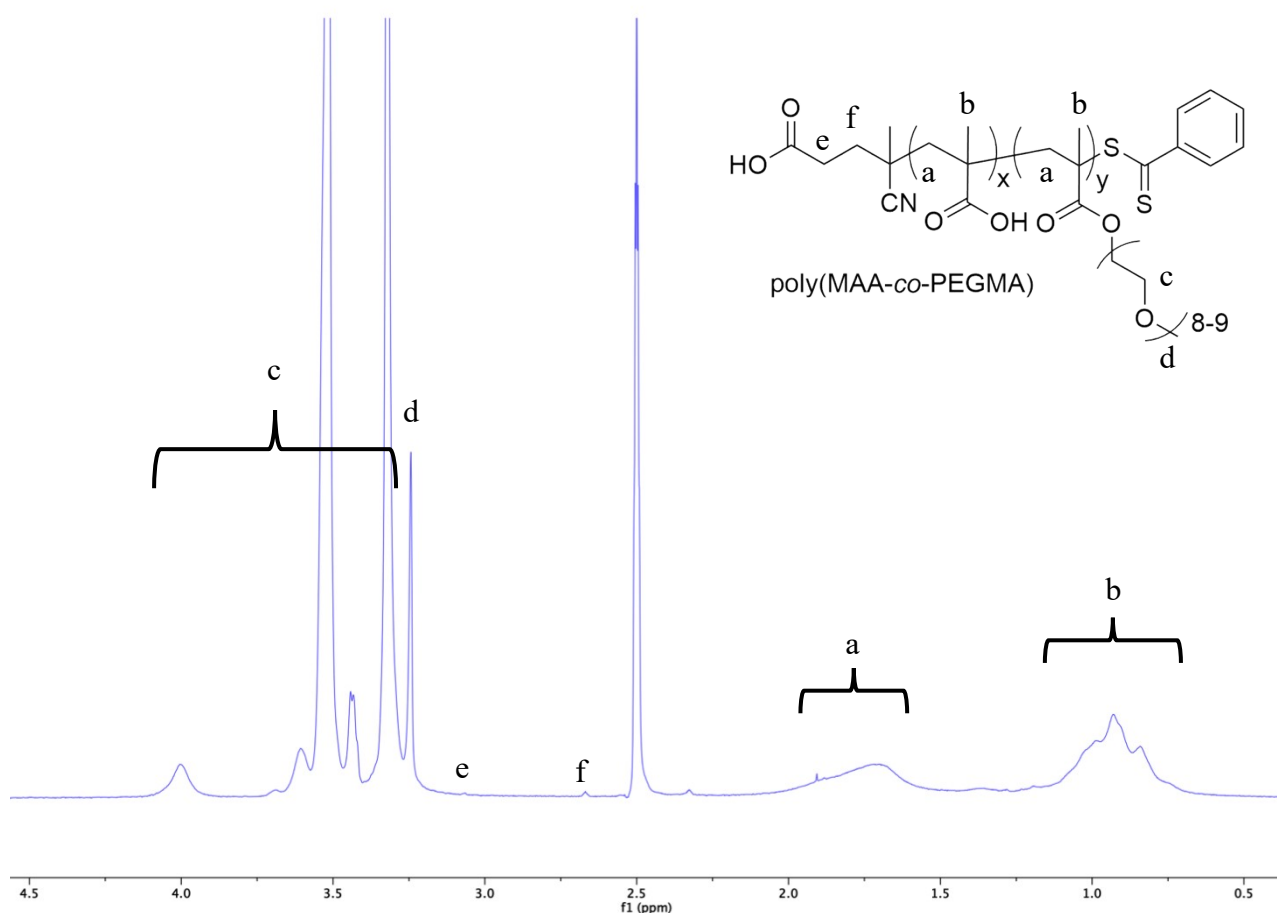

**Figure S1:** <sup>1</sup>H NMR spectrum of poly(MAA<sub>80</sub>-co-PEGMA<sub>20</sub>), with major protons assigned where possible.

**Feed ratio (MAA:PEGMA) Mn(kDa)**

**Notes**

|              |      |                      |
|--------------|------|----------------------|
| <b>60:40</b> | 12.6 | Viscous liquid       |
| <b>70:30</b> | 11.5 | Malleable            |
| <b>80:20</b> | 11.3 | Malleable yet glassy |
| <b>90:10</b> | 26.1 | Brittle              |

**Table S1:**  $M_n$  of poly(MAA-*co*-PEGMA) as calculated using  $^1\text{H}$  NMR spectroscopy (by way of integration). Additional notes on appearance of samples are provided.

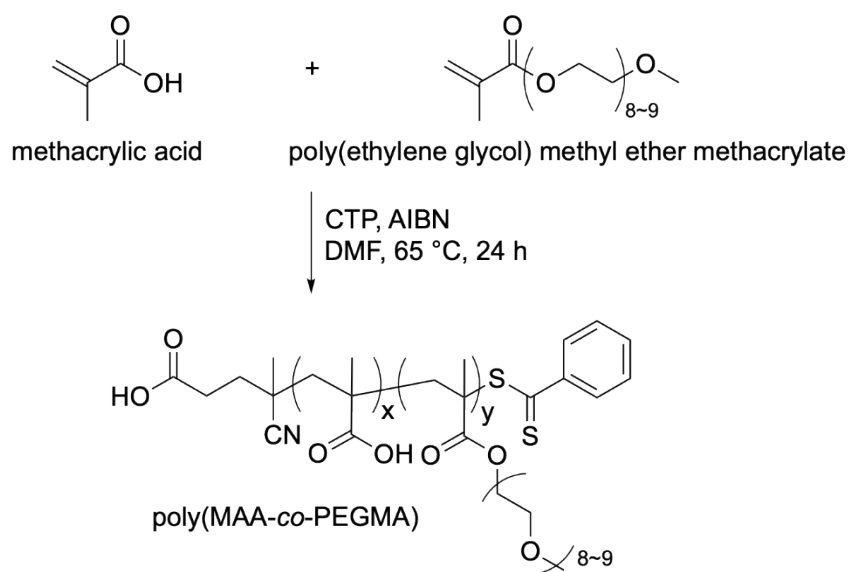

**Scheme S1:** Pathway to synthesis of poly(MAA-*co*-PEGMA) temperature-responsive copolymers.

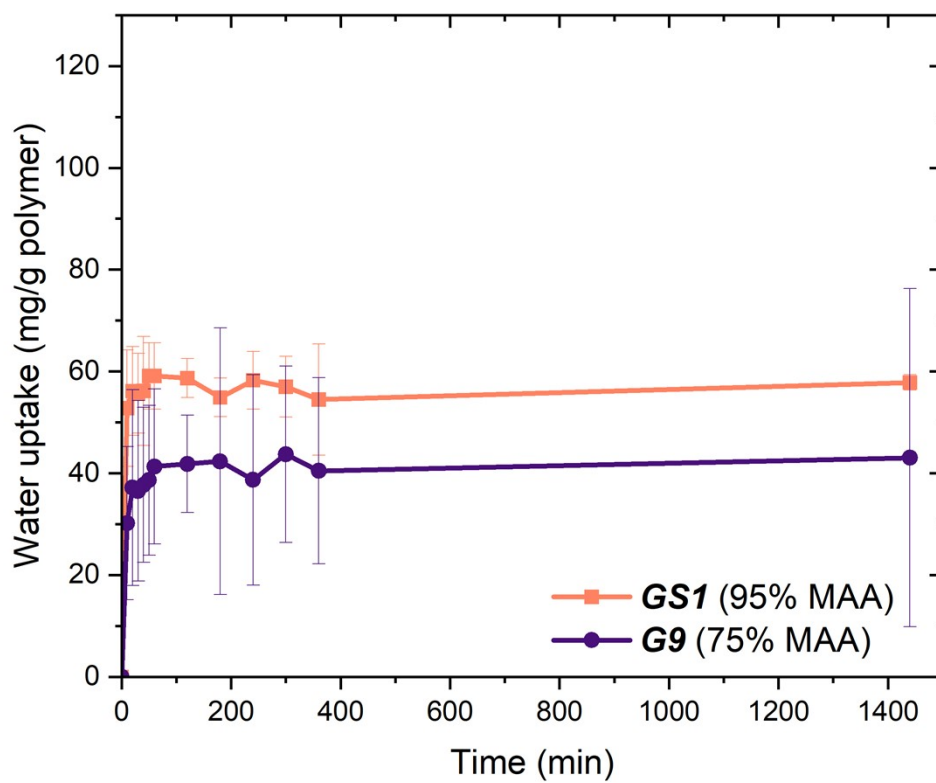

**Figure S2:** Water uptake over 24 hours of *GS1* and *G9*, comparing MAA content. *GS1* used a 95:5 ratio of MAA to PEGDMA (10,000 Da).

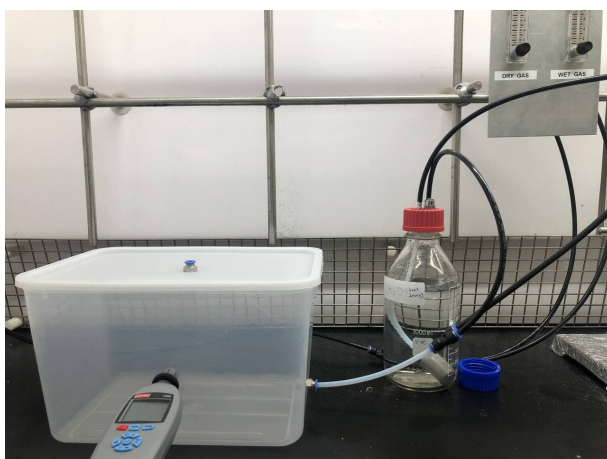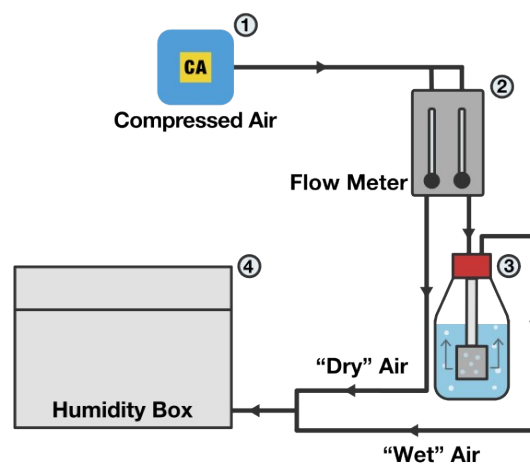

**Figure S3:** A photograph of the humidity box (left) and a schematic of the system (right).
